# Supplementary material for: PARD3 dysfunction in conjunction with dynamic HIPPO signaling drives cortical enlargement with massive heterotopia
Source: PubMed Central journal article supplement — Genes Dev. 2018 Jun 1;32(11-12):763–80. doi: 10.1101/gad.313171.118 (PMC6049519; doi:10.1101/gad.313171.118), 2018-06-01
Supplement: supp_gad.313171.118_Supplemental_Fig_S2.pdf [file supp_gad.313171.118_Supplemental_Fig_S2.pdf]

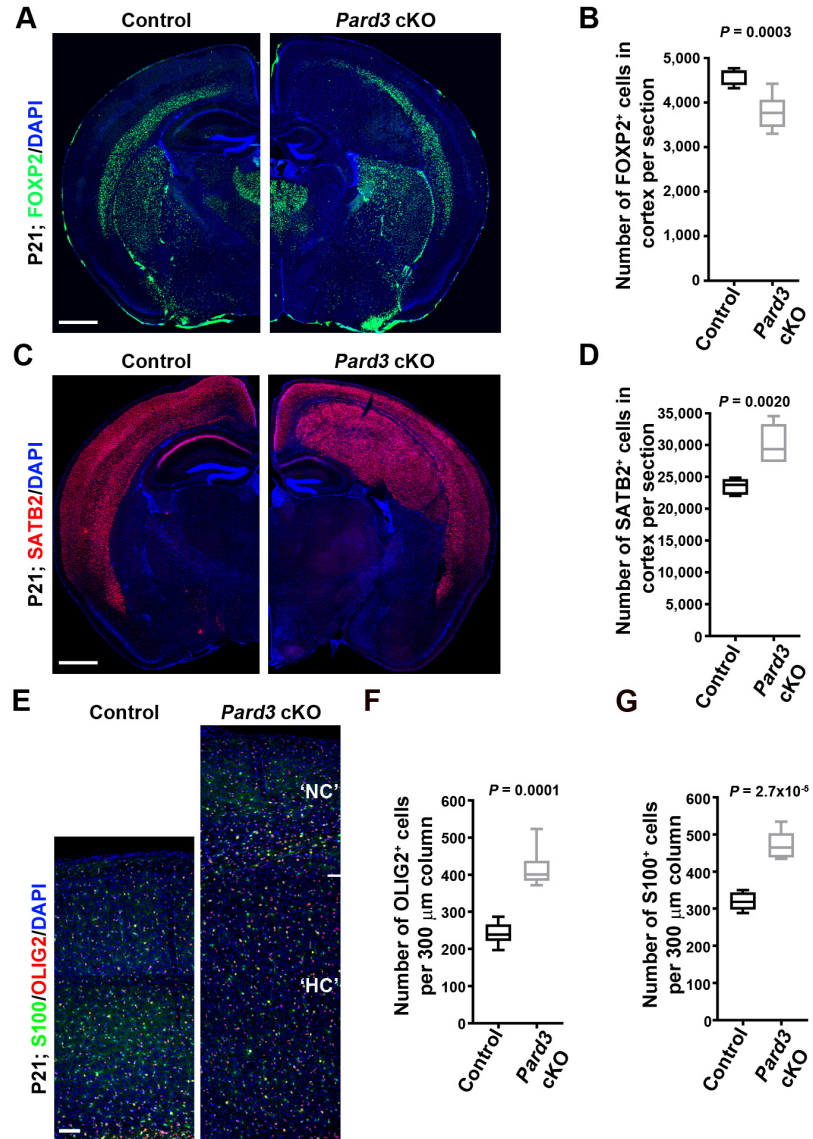

**Supplemental Figure S2: *Pard3* deletion leads to systematic alterations in cortical cell composition.** (A) Representative confocal images of P21 control and *Pard3* cKO coronal brain sections stained for layer VI neuronal marker FOXP2 (green) and counter-stained with DAPI (blue). Scale bar: 1 mm. (B) Quantification of the total number of FOXP2<sup>+</sup> cortical neurons per section in control and *Pard3* cKO mice at P21 (n=8 per genotype; unpaired two-tailed t-test with Welch's correction). (C) Representative confocal images of P21 control and *Pard3* cKO coronal brain sections stained for layer II/III/V neuronal marker SATB2 (red) and counter-stained with DAPI (blue). Scale bars: 1 mm. (D) Quantification of the total number of SATB2<sup>+</sup> cortical neurons per section in control and *Pard3* cKO mice at P21 (n=6 per genotype; unpaired two-tailed t-test with Welch's correction). (E) Representative confocal images of P21 control and *Pard3* cKO cortices stained for astrocyte marker S100 (green) and oligodendrocyte marker OLIG2 (red), and counter-stained for DAPI (blue). Scale bar: 70 μm. (F) Quantification of the number of OLIG2<sup>+</sup> (left) and S100<sup>+</sup> cells (right) per 300 μm radial column in P21 control and *Pard3* cKO mice (n=6 per genotype; unpaired two-tailed t-test with Welch's correction). For all box-whisker plots: center line, median; box, interquartile range; whiskers, minimum and maximum.
