# Supplementary material for: PARD3 dysfunction in conjunction with dynamic HIPPO signaling drives cortical enlargement with massive heterotopia
Source: PubMed Central journal article supplement — Genes Dev. 2018 Jun 1;32(11-12):763–80. doi: 10.1101/gad.313171.118 (PMC6049519; doi:10.1101/gad.313171.118), 2018-06-01
Supplement: supp_gad.313171.118_Supplemental_Fig_S3.pdf [file supp_gad.313171.118_Supplemental_Fig_S3.pdf]

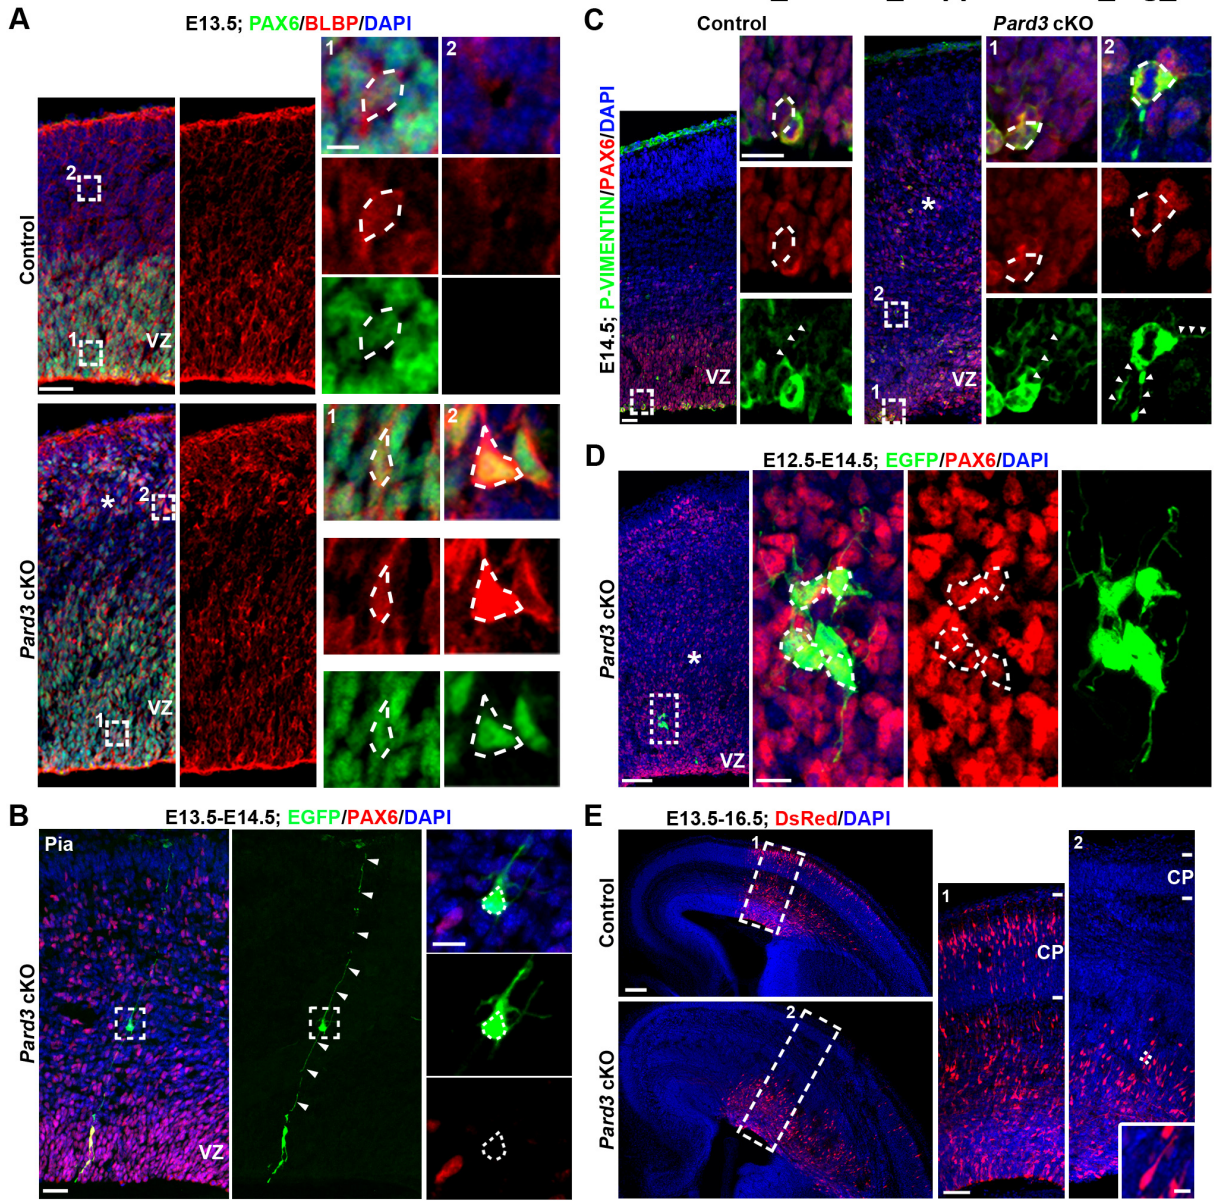

**Supplemental Figure S3: Morphological analysis of RGPs in *Pard3* cKO cortex (A)**

Representative confocal images of E13.5 control and *Pard3* cKO cortices stained for PAX6 (green) and a bona-fide RGP marker BLBP (red), and counter-stained for DAPI (blue). High-magnification images of the VZ (areas 1) and extra-VZ (areas 2) are shown to the right. Broken line polygons indicate the cell bodies of representative progenitors in each group. Scale bars: 30  $\mu\text{m}$  (left) and 5  $\mu\text{m}$  (right). **(B)** Representative confocal images of the *Pard3* cKO cortex received *in utero* intraventricular injection of low-titer EGFP-expressing retrovirus at E13.5, stained for PAX6 (red) and EGFP (green), and counter-stained with DAPI (blue) at E14.5. Filled arrowheads show the long radial glial fiber of a PAX6<sup>+</sup> RGP in the VZ reaching the pia surface. High-magnification images of an EGFP-expressing, PAX6<sup>-</sup> differentiating progeny closely associated with the radial glial fiber (broken line square) are shown to the right. Scale bars: 30  $\mu\text{m}$  (left) and 10  $\mu\text{m}$  (right). **(C)** Representative confocal images of E14.5 control and *Pard3* cKO cortices stained for PAX6 (red) and p-VIMENTIN (green), and counter-stained for DAPI (blue). High-magnification images of dividing RGPs in the VZ (area 1) and extra-VZ (area 2) are shown to the right. Broken line polygons indicate the cell bodies of representative dividing RGPs in each group. RGP fibers are highlighted by arrowheads. Asterisk indicates ectopic PAX6<sup>+</sup> progenitors in *Pard3* cKO cortex. Scale bars: 30  $\mu\text{m}$  (left) and 10  $\mu\text{m}$  (right). **(D)** Representative confocal images of the *Pard3* cKO cortex received *in utero* intraventricular injection of EGFP-expressing retrovirus at E12.5, stained for PAX6 (red) and EGFP (green), and counter-stained for DAPI (blue) at E14.5. High-magnification images of EGFP-expressing PAX6<sup>+</sup> RGPs in extra-VZ (broken line rectangle) are shown to the right. Broken line polygons indicate the cell bodies of the representative RGPs. Note that the ectopic PAX6<sup>+</sup> cells grow multiple short processes. Scale bars: 30  $\mu\text{m}$  (left) and 10  $\mu\text{m}$  (right). **(E)** Representative confocal images of the control and

*Pard3* cKO cortices received *in utero* intraventricular electroporation of DsRed-expressing plasmid at E13.5, stained for PAX6 (red) and EGFP (green), and counter-stained with DAPI (blue) at E16.5. High-magnification images (broken line areas 1 and 2) are shown to the right. Image of representative cells with a bipolar morphology in the SVZ/IZ is shown as the inset. Note that, while a significant fraction of DsRed-expressing cells migrate to the cortical plate in the control cortex, very few DsRed-expressing cells are found in the cortical plate of the *Pard3* cKO cortex (control,  $31.0 \pm 2.4\%$ ; *Pard3* cKO,  $1.9 \pm 1.1\%$ ;  $n=3$  per genotype;  $p < 0.0001$ ; unpaired two-tailed t-test with Welch's correction; mean  $\pm$  SEM). Scale bars: 150  $\mu\text{m}$  (left) and 30  $\mu\text{m}$  (middle) and 10  $\mu\text{m}$  (right).
