# Supplementary material for: PARD3 dysfunction in conjunction with dynamic HIPPO signaling drives cortical enlargement with massive heterotopia
Source: PubMed Central journal article supplement — Genes Dev. 2018 Jun 1;32(11-12):763–80. doi: 10.1101/gad.313171.118 (PMC6049519; doi:10.1101/gad.313171.118), 2018-06-01
Supplement: supp_gad.313171.118_Supplemental_Fig_S4.pdf [file supp_gad.313171.118_Supplemental_Fig_S4.pdf]

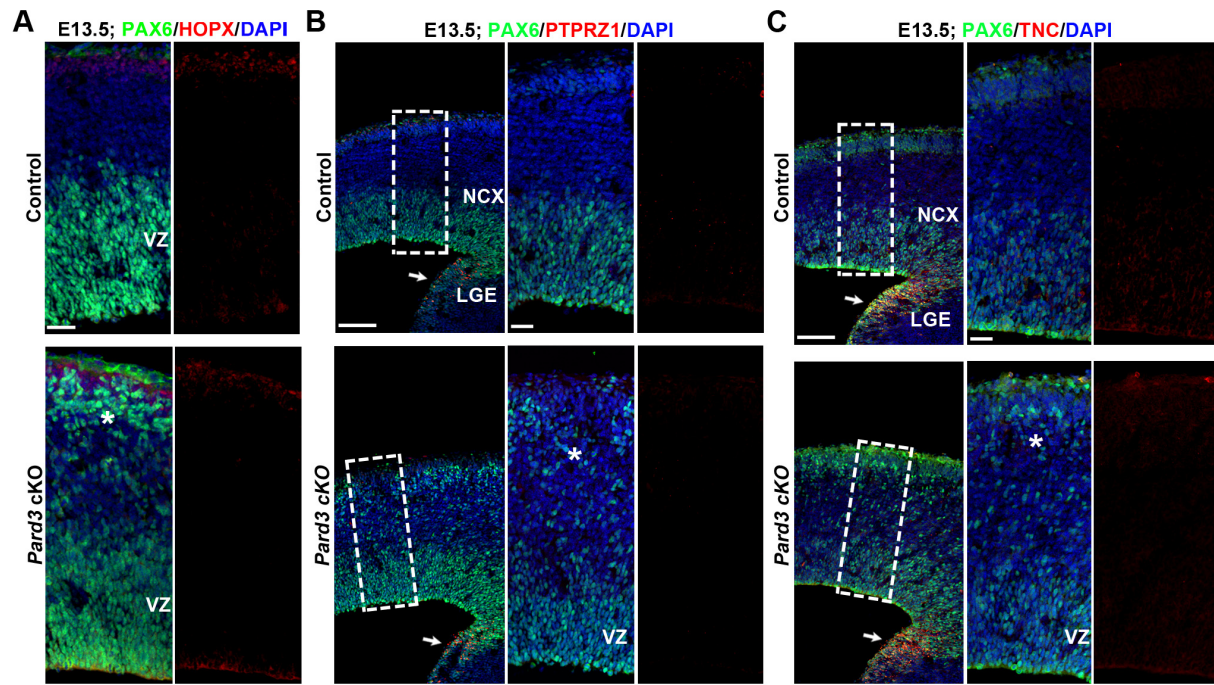

**Supplemental Figure S4: Ectopic RGPs in *Pard3* cKO cortex do not express oRG markers.**

**(A)** Representative confocal images of E13.5 control and *Pard3* cKO cortices stained for PAX6 (green) and oRG marker HOPX (red), and counter-stained for DAPI (blue). Asterisk indicates ectopic PAX6<sup>+</sup> progenitors in *Pard3* cKO cortex. Scale bars: 30 μm. **(B)** Representative images of E13.5 control and *Pard3* cKO cortices stained for PAX6 (green) and oRG marker PTPRZ1 (red), and counter-stained for DAPI (blue). High magnification images of the cortex (broken line rectangles) are shown to the right. Arrows indicate PTPRZ1 signal in the LGE. Asterisk indicates ectopic PAX6<sup>+</sup> progenitors in *Pard3* cKO cortex. Scale bars: 100 μm (left) and 30 μm (right). **(C)** Representative images of E13.5 control and *Pard3* cKO cortices stained for PAX6 (green) and oRG marker TNC (red), and counter-stained for DAPI (blue). High magnification images of the cortex (broken line rectangles) are shown to the right. Arrows indicate TNC signal in the LGE. Asterisk indicates ectopic PAX6<sup>+</sup> progenitors in *Pard3* cKO cortex. Scale bars: 100 μm (left) and 30 μm (right).
