# Supplementary material for: PARD3 dysfunction in conjunction with dynamic HIPPO signaling drives cortical enlargement with massive heterotopia
Source: PubMed Central journal article supplement — Genes Dev. 2018 Jun 1;32(11-12):763–80. doi: 10.1101/gad.313171.118 (PMC6049519; doi:10.1101/gad.313171.118), 2018-06-01
Supplement: supp_gad.313171.118_Supplemental_Fig_S5.pdf [file supp_gad.313171.118_Supplemental_Fig_S5.pdf]

**A**

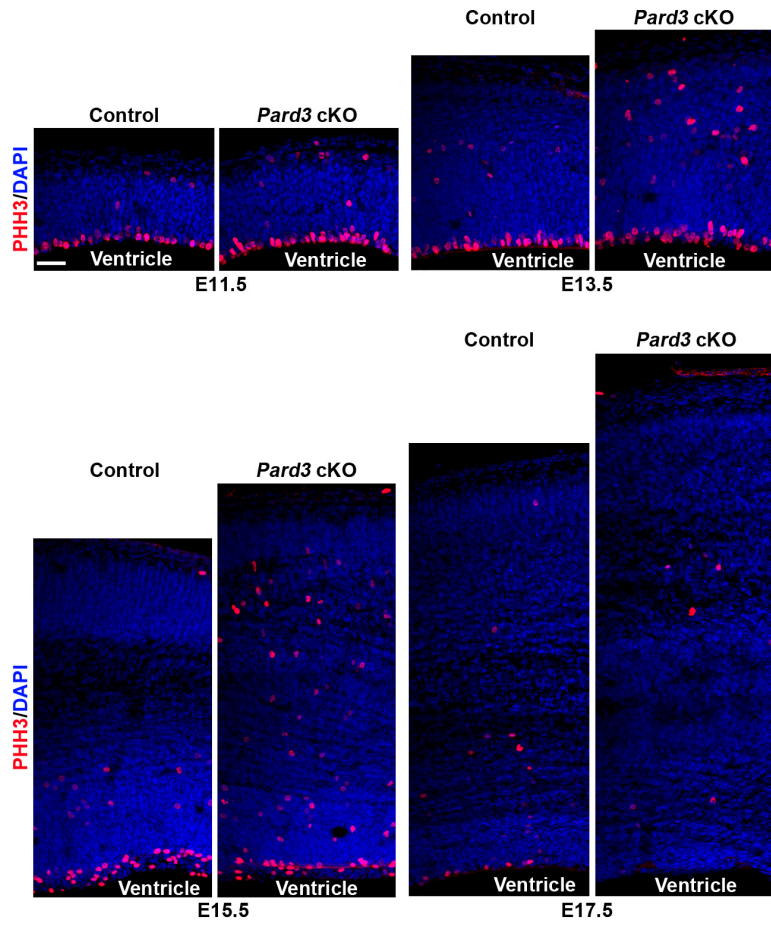

**B**

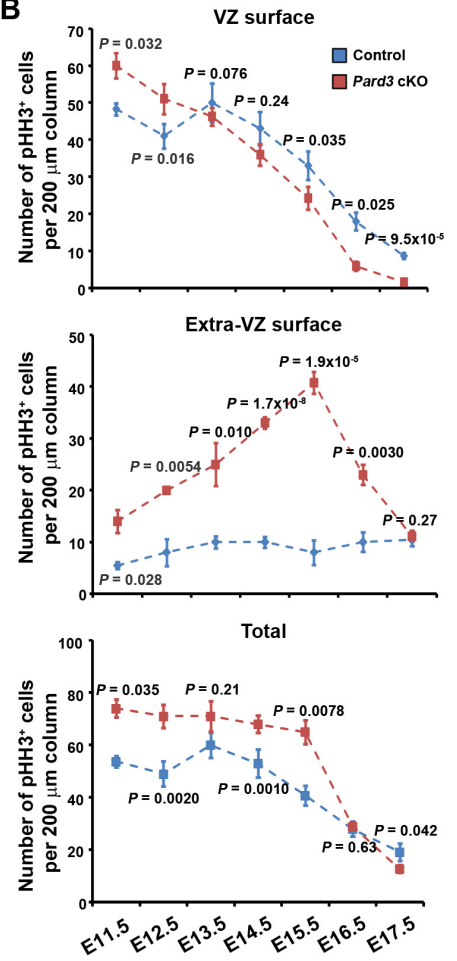

**Supplemental Figure S5: *Pard3* deletion leads to biphasic changes in the number and localization of the dividing cells.** (A) Representative confocal images of control and *Pard3* cKO cortices stained for mitotic cell marker pHH3 (red) and counter-stained for DAPI (blue) at E11.5 (top left), E13.5 (top right), E15.5 (bottom left) and e17.5 (bottom right). Scale bars: 30  $\mu$ m. (B) Quantification of the number of pHH3<sup>+</sup> cells per 200  $\mu$ m radial column at the VZ surface (top), extra-VZ surface (middle), or in the entire cortex (bottom) of the control (blue broken line) and *Pard3* cKO (red broken line) mice (two-tailed Mann-Whitney test). Data are presented as mean  $\pm$  SEM. E11.5: control, n=4; *Pard3* cKO, n=6; E12.5: control, n=6; *Pard3* cKO, n=4; E13.5: control, n=4; *Pard3* cKO, n=4; E14.5: control, n=6; *Pard3* cKO, n=5; E15.5: control, n=5; *Pard3* cKO, n=4; E16.5: control, n=4; *Pard3* cKO, n=10; E17.5: control, n=4; *Pard3* cKO, n=4.
