# Supplementary material for: PARD3 dysfunction in conjunction with dynamic HIPPO signaling drives cortical enlargement with massive heterotopia
Source: PubMed Central journal article supplement — Genes Dev. 2018 Jun 1;32(11-12):763–80. doi: 10.1101/gad.313171.118 (PMC6049519; doi:10.1101/gad.313171.118), 2018-06-01
Supplement: supp_gad.313171.118_Supplemental_Fig_S6.pdf [file supp_gad.313171.118_Supplemental_Fig_S6.pdf]

**A**

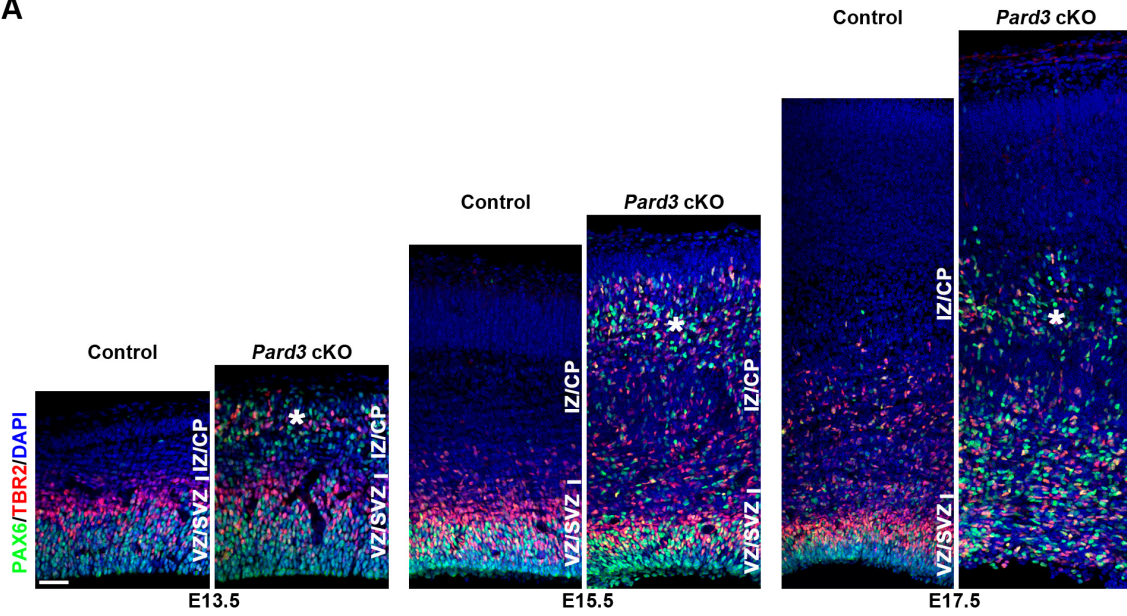

**B**

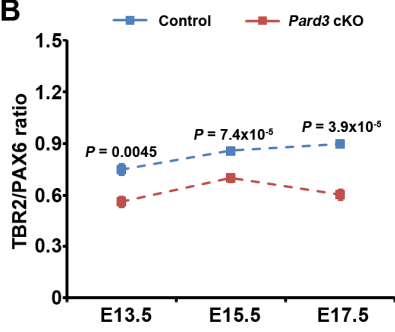

**Supplementary Figure S6: *Pard3* deletion causes a reduction in IP generation by RGPs. (A)**

Representative confocal images of control and *Pard3* cKO cortices stained for PAX6 (green) and IP marker TBR2 (red), and counter-stained for DAPI (blue) at E13.5 (left), E15.5 (middle), and E17.5 (right). Asterisks indicate ectopic RGPs and IPs in the IZ and CP. Scale bar: 30  $\mu$ m. **(B)**

The TBR2/PAX6 ratio in control (broken blue line) and *Pard3* cKO (broken red line) mice at E13.5, E15.5 and E17.5 (n=4 per genotype; two-tailed Mann-Whitney test). Data are presented as mean  $\pm$  SEM.
