# Supplementary material for: PARD3 dysfunction in conjunction with dynamic HIPPO signaling drives cortical enlargement with massive heterotopia
Source: PubMed Central journal article supplement — Genes Dev. 2018 Jun 1;32(11-12):763–80. doi: 10.1101/gad.313171.118 (PMC6049519; doi:10.1101/gad.313171.118), 2018-06-01
Supplement: supp_gad.313171.118_Supplemental_Fig_S7.pdf [file supp_gad.313171.118_Supplemental_Fig_S7.pdf]

**A**

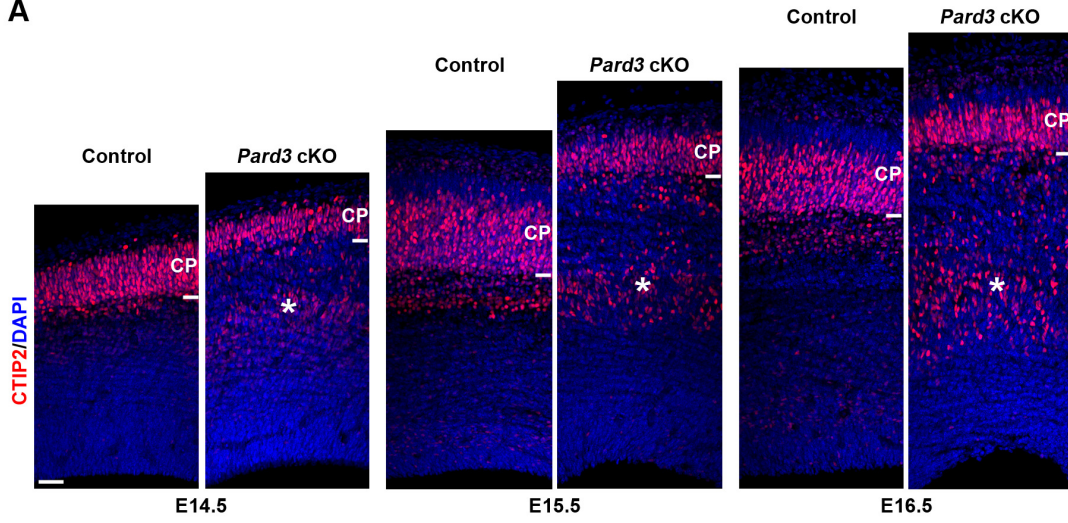

**B**

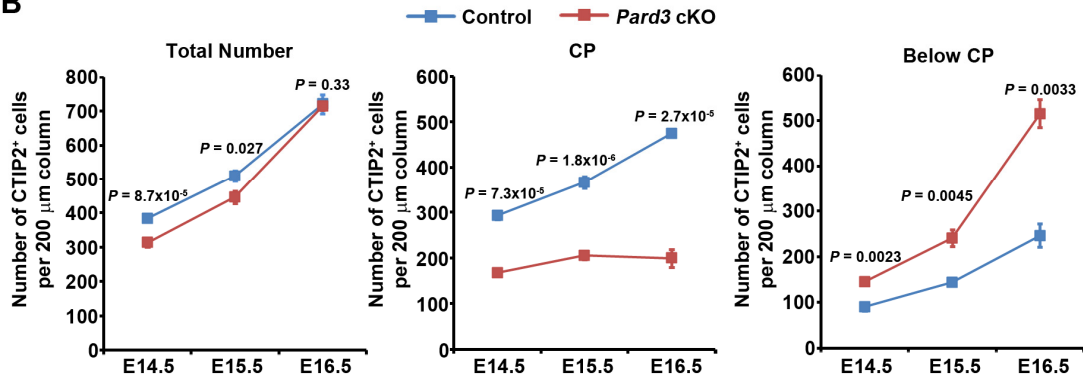

**Supplemental Figure S7: *Pard3* deletion suppresses production of CTIP2<sup>+</sup> neurons in the CP while accelerating generation of CTIP2<sup>+</sup> neurons located below the CP. (A)** Representative confocal images of control and *Pard3* cKO cortices stained for CTIP2 (red) and counter-stained for DAPI (blue) from E14.5 to E16.5 (from left to right). Asterisks indicate CTIP2<sup>+</sup> cells located below CP (i.e. the future ‘HC’) in *Pard3* cKO cortices. Scale bar: 30  $\mu$ m.

**(B)** Quantification of the number of CTIP2<sup>+</sup> cells per 200  $\mu$ m radial column in the entire cortex (left), CP (middle), or below CP (right) of control (blue line) and *Pard3* cKO (red line) mice from E14.5 to E16.5. Data are presented as mean  $\pm$  SEM. Two-tailed Mann-Whitney test was used to assess statistical significance. E14.5: control, n=4; *Pard3* cKO, n=5; E15.5: control, n=7; *Pard3* cKO, n=5; E16.5: control, n=3; *Pard3* cKO, n=3.
