# Supplementary material for: PARD3 dysfunction in conjunction with dynamic HIPPO signaling drives cortical enlargement with massive heterotopia
Source: PubMed Central journal article supplement — Genes Dev. 2018 Jun 1;32(11-12):763–80. doi: 10.1101/gad.313171.118 (PMC6049519; doi:10.1101/gad.313171.118), 2018-06-01
Supplement: supp_gad.313171.118_Supplemental_Fig_S8.pdf [file supp_gad.313171.118_Supplemental_Fig_S8.pdf]

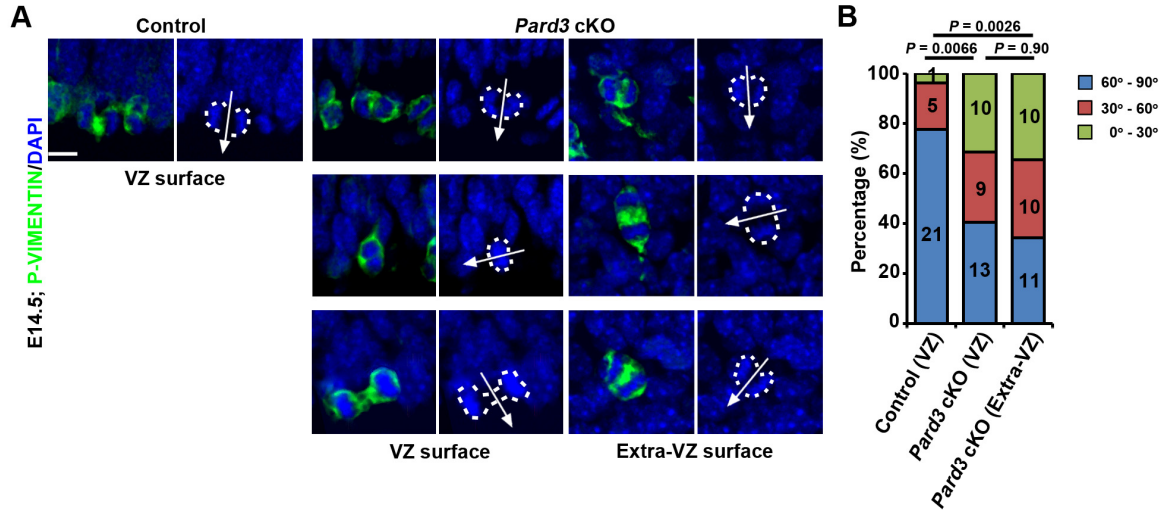

**Supplemental Figure S8: *Pard3* deletion randomizes the mitotic spindle orientation of dividing RGPs.** (A) Representative confocal images of mitotic RGPs stained for P-VIMENTIN (green) and counter-stained with DAPI (blue) at E14.5 in the control and *Pard3* cKO cortices. Broken lines indicate the contour of dividing RGPs and arrows indicate the cleavage plane. Scale bars: 5  $\mu$ m. (B) Percentage of the dividing RGPs with 60°-90° (blue), 30°-60° (red), or 0°-30° (green) mitotic cleavage plane orientation, determined as the angle between the mitotic cleavage plane and the VZ surface, in the control (n=3) or *Pard3* cKO (n=3) cortices at E14.5 (Chi-square test). Note that the mitotic cleavage plane of dividing RGPs at or away from the VZ surface becomes randomized in the *Pard3* cKO cortex compared with the control.
