# Supplementary material for: PARD3 dysfunction in conjunction with dynamic HIPPO signaling drives cortical enlargement with massive heterotopia
Source: PubMed Central journal article supplement — Genes Dev. 2018 Jun 1;32(11-12):763–80. doi: 10.1101/gad.313171.118 (PMC6049519; doi:10.1101/gad.313171.118), 2018-06-01
Supplement: supp_gad.313171.118_Supplemental_Fig_S10.pdf [file supp_gad.313171.118_Supplemental_Fig_S10.pdf]

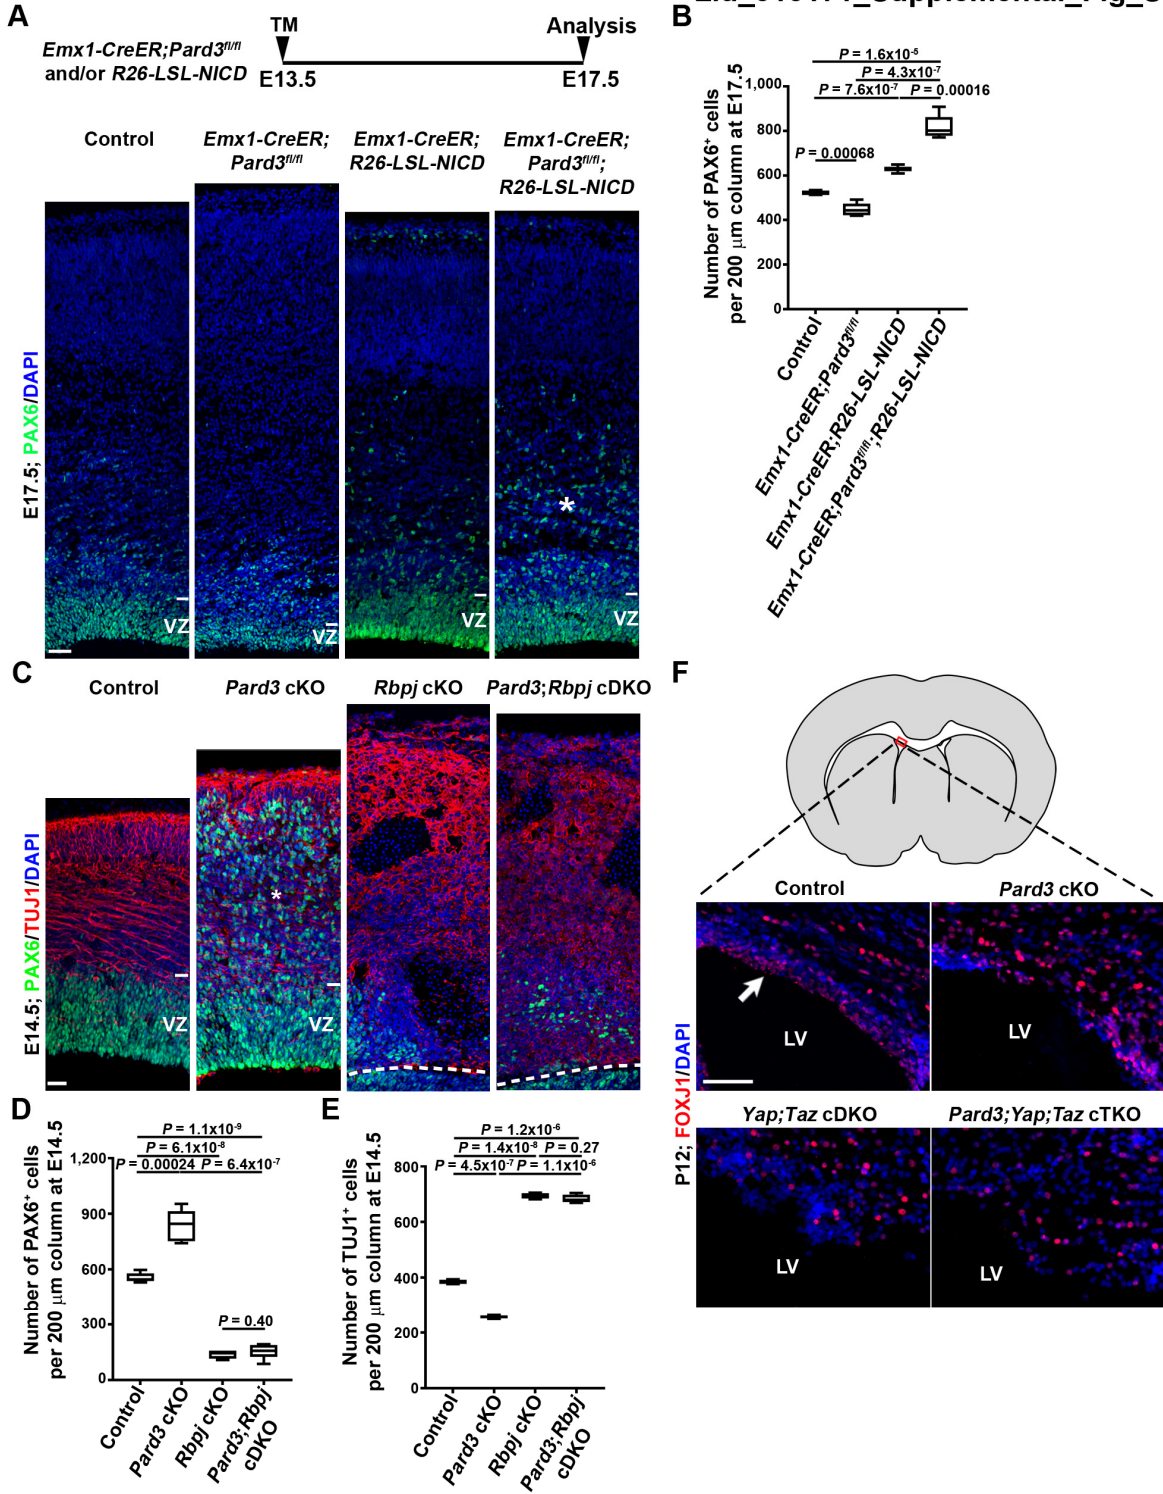

**Supplemental Figure S10: Functional interaction between PARD3 and NOTCH signaling.**

**(A)** Representative confocal images of E17.5 control *Emx1-CreER;Pard3<sup>fl/fl</sup>*, *Emx1-CreER;R26-LSL-NICD*, and *Emx1-CreER;Pard3<sup>fl/fl</sup>;R26-LSL-NICD* (from left to right) cortices stained for PAX6 (green) and counter-stained for DAPI (blue). Asterisk indicates the ectopic PAX6<sup>+</sup> cells in *Pard3* cKO cortex. Scale bar: 30  $\mu$ m. **(B)** Quantification of the number of PAX6<sup>+</sup> cells per 200  $\mu$ m radial column in VZ (blue) and extra-VZ (red) of E17.5 cortices (n=6 per genotype; unpaired two-tailed t-test with Welch's correction). **(C)** Representative confocal images of E14.5 control, *Pard3* cKO, *Rbpj* cKO, and *Pard3;Rbpj* cDKO (from left to right) cortices stained for PAX6 (green) and TUJ1 (red), and counter-stained for DAPI (blue). Asterisk indicates the ectopic PAX6<sup>+</sup> cells in *Pard3* cKO cortex. Broken lines indicate the VZ surface. Scale bar: 30  $\mu$ m. **(D, E)** Quantification of the number of PAX6<sup>+</sup> (d) and TUJ1<sup>+</sup> (e) cells per 200  $\mu$ m radial column of the cortex at E14.5 (n=4 per genotype; unpaired two-tailed t-test with Welch's correction). **(F)** Representative confocal images of P12 control, *Pard3* cKO, *Yap;Taz* cDKO, and *Pard3;Yap;Taz* cTKO cortices stained for FOXJ1 (red), an ependymal cell marker, and counter-stained with DAPI (blue). The schematic of the dorsal surface of the lateral ventricle where the images were taken is shown at the top. Arrows indicate FOXJ1<sup>+</sup> ependymal cells at the dorsal side of the lateral ventricle. LV, lateral ventricle. Scale bar: 70  $\mu$ m. For all box-whisker plots: center line, median; box, interquartile range; whiskers, minimum and maximum.
