# Supplementary material for: PARD3 dysfunction in conjunction with dynamic HIPPO signaling drives cortical enlargement with massive heterotopia
Source: PubMed Central journal article supplement — Genes Dev. 2018 Jun 1;32(11-12):763–80. doi: 10.1101/gad.313171.118 (PMC6049519; doi:10.1101/gad.313171.118), 2018-06-01
Supplement: supp_gad.313171.118_Supplemental_movie_legends.pdf [file supp_gad.313171.118_Supplemental_movie_legends.pdf]

## **SUPPLEMENTAL MOVIE LEGENDS**

**Supplemental Movie S1: 3D reconstruction of an E14.5 control brain hemisphere injected with EGFP-expressing retrovirus at E13.5.** The pial surface and the lateral ventricle are represented by colored lines; Green filled circles represent RGPs, yellow filled circles represent IPs, and red filled circles represent Ns.

**Supplemental Movie S2: 3D reconstruction of an E14.5 *Pard3* cKO brain hemisphere injected with EGFP-expressing retrovirus at E13.5.** The pial surface and the lateral ventricle are represented by colored lines; Green filled circles represent RGPs, yellow filled circles represent IPs, and red filled circles represent Ns.

**Supplemental Movie S3: 3D reconstruction of an E16.5 control brain hemisphere injected with EGFP-expressing retrovirus at E15.5.** The pial surface and the lateral ventricle are represented by colored lines; Green filled circles represent RGPs, yellow filled circles represent IPs, and red filled circles represent Ns.

**Supplemental Movie S4: 3D reconstruction of an E16.5 *Pard3* cKO brain hemisphere injected with EGFP-expressing retrovirus at E15.5.** The pial surface and the lateral ventricle are represented by colored lines; Green filled circles represent RGPs, yellow filled circles represent IPs, and red filled circles represent Ns.
